# Supplementary material
Source: PubMed Central journal article supplement (PMC5535032)
Supplement: 10.1074_M117.775155_jbc.M117.775155-1.pdf [file 10.1074_M117.775155_jbc.M117.775155-1.pdf]

## Supplemental data 1

### Identification of small molecule inhibitor of HBV replication via HBX interaction

Subhanita Ghosh<sup>1,a</sup>, Abhinav Kaushik<sup>2</sup>, Sachin Khurana<sup>3</sup>, Aditi Varshney<sup>4</sup>, Avishek Kumar Singh<sup>4</sup>, Pradeep Dahiya<sup>5</sup>, Jitendra K. Thakur<sup>5</sup>, Shiv Kumar Sarin<sup>4</sup>, Dinesh Gupta<sup>2</sup>, Pawan Malhotra<sup>3,\*,§</sup>, Sunil K. Mukherjee<sup>6,\*,§</sup>, Raj K. Bhatnagar<sup>1,\*,§</sup>

#### Experimentally Negative (No Anti-HBx activity)

#### Experimentally Positive (Anti-HBx activity at 50 $\mu$ mol)

| IRID           | QED score  | Binding affinity (Kcal/mol) |
|----------------|------------|-----------------------------|
| IR2105         | 0.44       | -10.6                       |
| IR3049         | 0.5        | -10.6                       |
| IR8414         | 0.47       | -10.6                       |
| IR6514         | 0.51       | -10.5                       |
| IR13218        | 0.52       | -10.5                       |
| IR6099         | 0.58       | -10.4                       |
| IR6707         | 0.78       | -10.4                       |
| IR7845         | 0.41       | -10.3                       |
| IR11718        | 0.42       | -10.3                       |
| IR1068         | 0.66       | -10.2                       |
| IR5076         | 0.59       | -10.2                       |
| IR7116         | 0.53       | -10.2                       |
| IR221          | 0.62       | -10.1                       |
| IR711          | 0.76       | -10.1                       |
| IR1109         | 0.79       | -10.1                       |
| IR3260         | 0.43       | -10.1                       |
| IR4183         | 0.41       | -10.1                       |
| IR8398         | 0.76       | -10.1                       |
| IR9121         | 0.7        | -10.1                       |
| IR9650         | 0.48       | -10.1                       |
| IR9736         | 0.57       | -10.1                       |
| <b>IR12828</b> | <b>0.8</b> | <b>-10.1</b>                |
| IR1828         | 0.54       | -10                         |
| IR3695         | 0.75       | -10                         |
| IR3758         | 0.64       | -10                         |
| IR6391         | 0.68       | -10                         |
| IR7347         | 0.69       | -10                         |
| IR8505         | 0.42       | -10                         |
| IR8818         | 0.58       | -10                         |
| IR9171         | 0.42       | -10                         |
| IR10008        | 0.57       | -10                         |
| IR10443        | 0.41       | -10                         |
| IR12857        | 0.62       | -10                         |

|               |             |             |
|---------------|-------------|-------------|
| IR14001       | 0.55        | -10         |
| IR14006       | 0.4         | -10         |
| IR14270       | 0.46        | -10         |
| IR2208        | 0.51        | -9.9        |
| IR2292        | 0.43        | -9.9        |
| IR2800        | 0.79        | -9.9        |
| IR3181        | 0.5         | -9.9        |
| IR3820        | 0.62        | -9.9        |
| IR4201        | 0.67        | -9.9        |
| IR5469        | 0.56        | -9.9        |
| IR6766        | 0.48        | -9.9        |
| IR8212        | 0.55        | -9.9        |
| <b>IR415</b>  | <b>0.6</b>  | <b>-9.9</b> |
| IR8948        | 0.55        | -9.9        |
| IR9687        | 0.55        | -9.9        |
| IR9790        | 0.83        | -9.9        |
| IR9912        | 0.58        | -9.9        |
| IR10455       | 0.69        | -9.9        |
| IR11315       | 0.46        | -9.9        |
| IR11491       | 0.6         | -9.9        |
| IR12177       | 0.5         | -9.9        |
| IR13126       | 0.49        | -9.9        |
| IR13172       | 0.45        | -9.9        |
| IR13586       | 0.47        | -9.9        |
| <b>IR336</b>  | <b>0.63</b> | <b>-9.9</b> |
| <b>IR842</b>  | <b>0.72</b> | <b>-9.9</b> |
| <b>IR7650</b> | <b>0.89</b> | <b>-9.8</b> |
| IR427         | 0.55        | -9.8        |
| IR1990        | 0.74        | -9.8        |
| IR2906        | 0.83        | -9.8        |
| IR3291        | 0.44        | -9.8        |
| IR3461        | 0.81        | -9.8        |
| IR3492        | 0.79        | -9.8        |
| IR3681        | 0.78        | -9.8        |
| IR3794        | 0.59        | -9.8        |
| IR3854        | 0.57        | -9.8        |
| IR4019        | 0.65        | -8.1        |
| IR4712        | 0.62        | -9.8        |
| IR4764        | 0.85        | -9.8        |
| IR4974        | 0.66        | -9.8        |
| IR4978        | 0.57        | -9.8        |
| IR6226        | 0.7         | -9.8        |
| IR6484        | 0.87        | -9.8        |
| IR6645        | 0.58        | -9.8        |
| IR6740        | 0.53        | -9.8        |
| IR7543        | 0.43        | -9.8        |

|                |             |             |
|----------------|-------------|-------------|
| IR8058         | 0.47        | -9.8        |
| IR8081         | 0.59        | -9.8        |
| IR8285         | 0.48        | -9.8        |
| IR9210         | 0.5         | -9.8        |
| IR9705         | 0.41        | -9.8        |
| IR10980        | 0.52        | -9.8        |
| IR11856        | 0.87        | -9.8        |
| IR11873        | 0.45        | -9.8        |
| IR12193        | 0.54        | -9.8        |
| IR12673        | 0.59        | -9.8        |
| IR13969        | 0.71        | -9.8        |
| IR14015        | 0.52        | -9.8        |
| IR14255        | 0.42        | -9.8        |
| <b>IR9602</b>  | <b>0.62</b> | <b>-9.8</b> |
| <b>IR7866</b>  | <b>0.65</b> | <b>-9.7</b> |
| IR249          | 0.69        | -9.7        |
| IR313          | 0.81        | -9.7        |
| IR556          | 0.48        | -9.7        |
| <b>IR2515</b>  | <b>0.6</b>  | <b>-9.7</b> |
| <b>IR1158</b>  | <b>0.66</b> | <b>-9.7</b> |
| <b>IR13426</b> | <b>0.63</b> | <b>-9.7</b> |
| IR858          | 0.7         | -9.7        |
| IR1435         | 0.59        | -9.7        |
| IR1797         | 0.47        | -9.7        |
| IR1886         | 0.57        | -9.7        |
| IR2015         | 0.72        | -9.7        |
| IR2316         | 0.57        | -9.7        |
| IR2536         | 0.59        | -9.7        |
| IR3082         | 0.57        | -9.7        |
| IR3689         | 0.46        | -9.7        |
| IR4836         | 0.66        | -9.7        |
| IR5133         | 0.66        | -9.7        |
| IR5679         | 0.63        | -9.7        |
| IR5876         | 0.47        | -9.7        |
| IR6698         | 0.56        | -9.7        |
| IR7692         | 0.49        | -9.7        |
| IR7707         | 0.69        | -9.7        |
| IR7979         | 0.84        | -9.7        |
| IR8134         | 0.45        | -9.7        |
| IR8799         | 0.53        | -9.7        |
| IR9385         | 0.54        | -9.7        |
| IR9462         | 0.46        | -9.7        |
| IR10372        | 0.42        | -9.7        |
| IR10675        | 0.48        | -9.7        |
| IR10843        | 0.46        | -9.7        |
| IR11239        | 0.43        | -9.7        |

|         |      |      |
|---------|------|------|
| IR11356 | 0.49 | -9.7 |
| IR11428 | 0.9  | -9.7 |
| IR11640 | 0.65 | -9.7 |
| IR11680 | 0.58 | -9.7 |
| IR11712 | 0.48 | -9.7 |
| IR12334 | 0.6  | -9.7 |
| IR12948 | 0.8  | -9.7 |
| IR13077 | 0.5  | -9.7 |
| IR13451 | 0.44 | -9.7 |
| IR13672 | 0.8  | -9.7 |
| IR319   | 0.47 | -9.6 |
| IR353   | 0.62 | -9.6 |
| IR665   | 0.84 | -9.6 |
| IR1197  | 0.88 | -9.6 |
| IR1244  | 0.44 | -9.6 |
| IR1418  | 0.68 | -9.6 |
| IR1547  | 0.56 | -9.6 |
| IR1634  | 0.55 | -9.6 |
| IR1787  | 0.56 | -9.6 |
| IR1890  | 0.69 | -9.6 |
| IR2196  | 0.56 | -9.6 |
| IR2725  | 0.6  | -9.6 |
| IR2867  | 0.46 | -9.6 |
| IR3306  | 0.5  | -9.6 |
| IR4317  | 0.72 | -9.6 |
| IR5421  | 0.68 | -9.6 |
| IR5496  | 0.81 | -9.6 |
| IR5823  | 0.67 | -9.6 |
| IR6347  | 0.72 | -9.6 |
| IR6383  | 0.47 | -9.6 |
| IR6495  | 0.51 | -9.6 |
| IR6809  | 0.79 | -9.6 |
| IR6946  | 0.67 | -9.6 |
| IR6979  | 0.49 | -9.6 |
| IR7239  | 0.67 | -9.6 |
| IR7816  | 0.41 | -9.6 |
| IR7860  | 0.66 | -9.6 |
| IR8143  | 0.48 | -9.6 |
| IR8718  | 0.61 | -9.6 |
| IR9322  | 0.53 | -9.6 |
| IR10507 | 0.69 | -9.6 |
| IR11354 | 0.46 | -9.6 |
| IR11407 | 0.46 | -9.6 |
| IR11504 | 0.64 | -9.6 |
| IR11687 | 0.67 | -9.6 |
| IR11756 | 0.55 | -9.6 |

|         |      |      |
|---------|------|------|
| IR11759 | 0.42 | -9.6 |
| IR12526 | 0.59 | -9.6 |
| IR12791 | 0.46 | -9.6 |
| IR13447 | 0.67 | -9.6 |
| IR13953 | 0.84 | -9.6 |
| IR53    | 0.59 | -9.5 |
| IR55    | 0.49 | -9.5 |
| IR222   | 0.71 | -9.5 |
| IR245   | 0.87 | -9.5 |
| IR639   | 0.71 | -9.5 |
| IR717   | 0.69 | -9.5 |
| IR739   | 0.46 | -9.5 |
| IR986   | 0.55 | -9.5 |
| IR1108  | 0.43 | -9.5 |
| IR1340  | 0.63 | -9.5 |
| IR1444  | 0.63 | -9.5 |
| IR2135  | 0.85 | -9.5 |
| IR2207  | 0.5  | -9.5 |
| IR2480  | 0.84 | -9.5 |
| IR2765  | 0.67 | -9.5 |
| IR2902  | 0.62 | -9.5 |
| IR3003  | 0.52 | -9.5 |
| IR3512  | 0.72 | -9.5 |
| IR3779  | 0.55 | -9.5 |
| IR4042  | 0.73 | -9.5 |
| IR4132  | 0.83 | -9.5 |
| IR4181  | 0.57 | -9.5 |
| IR4252  | 0.73 | -9.5 |
| IR4261  | 0.5  | -9.5 |
| IR4937  | 0.87 | -9.5 |
| IR5214  | 0.64 | -9.5 |
| IR5240  | 0.71 | -9.5 |
| IR5298  | 0.45 | -9.5 |
| IR6278  | 0.69 | -9.5 |
| IR6480  | 0.42 | -9.5 |
| IR6531  | 0.73 | -9.5 |
| IR6822  | 0.65 | -9.5 |
| IR6988  | 0.47 | -9.5 |
| IR7608  | 0.45 | -9.5 |
| IR7667  | 0.79 | -9.5 |
| IR8198  | 0.57 | -9.5 |
| IR8517  | 0.63 | -9.5 |
| IR8620  | 0.5  | -9.5 |
| IR8795  | 0.44 | -9.5 |
| IR8798  | 0.72 | -9.5 |
| IR8841  | 0.69 | -9.5 |

|         |      |      |
|---------|------|------|
| IR8976  | 0.57 | -9.5 |
| IR9447  | 0.68 | -9.5 |
| IR10155 | 0.43 | -9.5 |
| IR10525 | 0.75 | -9.5 |
| IR10860 | 0.72 | -9.5 |
| IR10891 | 0.53 | -9.5 |
| IR11290 | 0.64 | -9.5 |
| IR11314 | 0.51 | -9.5 |
| IR11417 | 0.61 | -9.5 |
| IR11671 | 0.72 | -9.5 |
| IR11769 | 0.66 | -9.5 |
| IR11844 | 0.67 | -9.5 |
| IR11940 | 0.45 | -9.5 |
| IR12072 | 0.71 | -9.5 |
| IR12115 | 0.44 | -9.5 |
| IR12415 | 0.76 | -9.5 |
| IR12563 | 0.49 | -9.5 |
| IR13080 | 0.65 | -9.5 |
| IR13101 | 0.91 | -9.5 |
| IR13303 | 0.66 | -9.5 |
| IR13464 | 0.75 | -9.5 |
| IR82    | 0.5  | -9.4 |
| IR101   | 0.61 | -9.4 |
| IR523   | 0.41 | -9.4 |
| IR984   | 0.55 | -9.4 |
| IR1131  | 0.53 | -9.4 |
| IR1173  | 0.51 | -9.4 |
| IR1382  | 0.41 | -9.4 |
| IR1588  | 0.58 | -9.4 |
| IR11    | 0.91 | -9.4 |
| IR1972  | 0.53 | -9.4 |
| IR2209  | 0.53 | -9.4 |
| IR2298  | 0.8  | -9.4 |
| IR2446  | 0.73 | -9.4 |
| IR2771  | 0.68 | -9.4 |
| IR3031  | 0.52 | -9.4 |
| IR3475  | 0.65 | -9.4 |
| IR3542  | 0.58 | -9.4 |
| IR3666  | 0.44 | -9.4 |
| IR4451  | 0.48 | -9.4 |
| IR4546  | 0.49 | -9.4 |
| IR4586  | 0.55 | -9.4 |
| IR4980  | 0.57 | -9.4 |
| IR5021  | 0.73 | -9.4 |
| IR5136  | 0.88 | -9.4 |
| IR5197  | 0.49 | -9.4 |

|         |      |      |
|---------|------|------|
| IR5246  | 0.51 | -9.4 |
| IR5260  | 0.55 | -9.4 |
| IR5368  | 0.75 | -9.4 |
| IR5819  | 0.71 | -9.4 |
| IR6060  | 0.65 | -9.4 |
| IR6368  | 0.78 | -9.4 |
| IR6412  | 0.52 | -9.4 |
| IR6555  | 0.57 | -9.4 |
| IR7114  | 0.44 | -9.4 |
| IR7128  | 0.71 | -9.4 |
| IR7270  | 0.43 | -9.4 |
| IR7277  | 0.65 | -9.4 |
| IR7354  | 0.61 | -9.4 |
| IR7559  | 0.71 | -9.4 |
| IR7905  | 0.55 | -9.4 |
| IR8039  | 0.89 | -9.4 |
| IR8109  | 0.48 | -9.4 |
| IR8538  | 0.79 | -9.4 |
| IR8560  | 0.66 | -9.4 |
| IR8780  | 0.71 | -9.4 |
| IR8954  | 0.56 | -9.4 |
| IR9025  | 0.74 | -9.4 |
| IR9073  | 0.63 | -9.4 |
| IR9376  | 0.57 | -9.4 |
| IR9595  | 0.73 | -9.4 |
| IR9625  | 0.49 | -9.4 |
| IR9990  | 0.53 | -9.4 |
| IR10201 | 0.72 | -9.4 |
| IR10673 | 0.71 | -9.4 |
| IR10778 | 0.46 | -9.4 |
| IR10885 | 0.57 | -9.4 |
| IR10986 | 0.61 | -9.4 |
| IR11266 | 0.47 | -9.4 |
| IR11489 | 0.46 | -9.4 |
| IR11943 | 0.51 | -9.4 |
| IR12064 | 0.6  | -9.4 |
| IR12444 | 0.49 | -9.4 |
| IR12628 | 0.82 | -9.4 |
| IR12641 | 0.69 | -9.4 |
| IR12721 | 0.47 | -9.4 |
| IR12872 | 0.66 | -9.4 |
| IR12978 | 0.44 | -9.4 |
| IR13038 | 0.42 | -9.4 |
| IR13250 | 0.5  | -9.4 |
| IR13678 | 0.63 | -9.4 |
| IR13705 | 0.64 | -9.4 |

|         |      |      |
|---------|------|------|
| IR13833 | 0.59 | -9.4 |
| IR13862 | 0.64 | -9.4 |
| IR14254 | 0.6  | -9.4 |
| IR42    | 0.73 | -9.3 |
| IR117   | 0.57 | -9.3 |
| IR178   | 0.59 | -9.3 |
| IR241   | 0.61 | -9.3 |
| IR740   | 0.91 | -9.3 |
| IR1212  | 0.54 | -9.3 |
| IR1273  | 0.54 | -9.3 |
| IR1627  | 0.41 | -9.3 |
| IR1822  | 0.61 | -9.3 |
| IR2152  | 0.48 | -9.3 |
| IR2172  | 0.46 | -9.3 |
| IR2756  | 0.76 | -9.3 |
| IR2781  | 0.43 | -9.3 |
| IR2958  | 0.43 | -9.3 |
| IR3135  | 0.9  | -9.3 |
| IR3215  | 0.72 | -9.3 |
| IR3322  | 0.75 | -9.3 |
| IR3366  | 0.55 | -9.3 |
| IR3423  | 0.44 | -9.3 |
| IR3440  | 0.41 | -9.3 |
| IR3776  | 0.77 | -9.3 |
| IR4043  | 0.66 | -9.3 |
| IR4250  | 0.66 | -9.3 |
| IR4292  | 0.62 | -9.3 |
| IR4426  | 0.54 | -9.3 |
| IR4564  | 0.6  | -9.3 |
| IR4796  | 0.69 | -9.3 |
| IR4827  | 0.66 | -9.3 |
| IR4844  | 0.54 | -9.3 |
| IR5027  | 0.53 | -9.3 |
| IR5029  | 0.79 | -9.3 |
| IR5453  | 0.42 | -9.3 |
| IR5473  | 0.67 | -9.3 |
| IR5952  | 0.57 | -9.3 |
| IR5991  | 0.63 | -9.3 |
| IR6158  | 0.62 | -9.3 |
| IR6177  | 0.59 | -9.3 |
| IR6217  | 0.45 | -9.3 |
| IR6370  | 0.46 | -9.3 |
| IR6376  | 0.5  | -9.3 |
| IR6732  | 0.5  | -9.3 |
| IR6835  | 0.66 | -9.3 |
| IR6921  | 0.64 | -9.3 |



|         |      |       |
|---------|------|-------|
| IR7073  | 0.67 | -9.3  |
| IR7113  | 0.43 | -9.3  |
| IR7372  | 0.7  | -9.3  |
| IR7374  | 0.54 | -9.3  |
| IR7377  | 0.44 | -9.3  |
| IR7681  | 0.67 | -9.3  |
| IR7803  | 0.66 | -9.3  |
| IR8062  | 0.73 | -9.3  |
| IR8376  | 0.51 | -9.3  |
| IR8471  | 0.57 | -9.3  |
| IR8679  | 0.63 | -9.3  |
| IR9133  | 0.87 | -9.3  |
| IR9297  | 0.76 | -9.3  |
| IR9344  | 0.46 | -9.3  |
| IR9395  | 0.92 | -9.3  |
| IR9509  | 0.75 | -9.3  |
| IR9613  | 0.69 | -9.3  |
| IR9628  | 0.54 | -9.3  |
| IR9693  | 0.67 | -9.3  |
| IR9778  | 0.74 | -9.3  |
| IR9826  | 0.59 | -9.3  |
| IR9895  | 0.49 | -9.3  |
| IR9948  | 0.7  | -9.3  |
| IR10227 | 0.65 | -9.3  |
| IR10350 | 0.77 | -9.3  |
| IR10512 | 0.7  | -9.3  |
| IR10704 | 0.82 | -9.3  |
| IR10771 | 0.4  | -9.3  |
| IR10851 | 0.81 | -9.3  |
| IR11013 | 0.76 | -9.3  |
| IR11372 | 0.51 | -9.3  |
| IR11450 | 0.46 | -9.3  |
| IR11620 | 0.43 | -9.3  |
| IR11715 | 0.73 | -9.3  |
| IR11724 | 0.5  | -9.3  |
| IR12163 | 0.72 | -9.3  |
| IR12203 | 0.43 | -9.3  |
| IR12328 | 0.49 | -9.3  |
| IR12828 | 0.8  | -10.1 |
| IR12860 | 0.68 | -9.3  |
| IR13144 | 0.51 | -9.3  |
| IR13619 | 0.58 | -9.3  |
| IR13650 | 0.82 | -9.3  |
| IR13766 | 0.61 | -9.3  |
| IR14064 | 0.78 | -9.3  |
| IR14083 | 0.74 | -9.3  |

|         |      |      |
|---------|------|------|
| IR14100 | 0.69 | -9.3 |
| IR14237 | 0.64 | -9.3 |
| IR14321 | 0.57 | -9.3 |
| IR136   | 0.65 | -9.2 |
| IR246   | 0.91 | -9.2 |
| IR400   | 0.54 | -9.2 |
| IR860   | 0.53 | -9.2 |
| IR930   | 0.53 | -9.2 |
| IR1114  | 0.71 | -9.2 |
| IR1286  | 0.48 | -9.2 |
| IR1405  | 0.66 | -9.2 |
| IR1457  | 0.48 | -9.2 |
| IR1603  | 0.56 | -9.2 |
| IR1777  | 0.67 | -9.2 |
| IR1863  | 0.74 | -9.2 |
| IR2032  | 0.84 | -9.2 |
| IR2129  | 0.71 | -9.2 |
| IR2139  | 0.65 | -9.2 |
| IR2433  | 0.83 | -9.2 |
| IR2555  | 0.58 | -9.2 |
| IR2777  | 0.58 | -9.2 |
| IR2952  | 0.73 | -9.2 |
| IR3238  | 0.59 | -9.2 |
| IR3323  | 0.8  | -9.2 |
| IR3376  | 0.64 | -9.2 |
| IR3605  | 0.44 | -9.2 |
| IR3665  | 0.66 | -9.2 |
| IR3872  | 0.51 | -9.2 |
| IR3972  | 0.5  | -9.2 |
| IR4063  | 0.55 | -9.2 |
| IR4479  | 0.72 | -9.2 |
| IR4553  | 0.5  | -9.2 |
| IR4567  | 0.41 | -9.2 |
| IR4680  | 0.47 | -9.2 |
| IR4688  | 0.69 | -9.2 |
| IR4745  | 0.69 | -9.2 |
| IR4816  | 0.46 | -9.2 |
| IR4930  | 0.63 | -9.2 |
| IR4969  | 0.6  | -9.2 |
| IR5023  | 0.45 | -9.2 |
| IR5086  | 0.56 | -9.2 |
| IR5465  | 0.63 | -9.2 |
| IR5508  | 0.47 | -9.2 |
| IR5725  | 0.41 | -9.2 |
| IR5906  | 0.71 | -9.2 |
| IR6105  | 0.45 | -9.2 |

|         |      |      |
|---------|------|------|
| IR6142  | 0.76 | -9.2 |
| IR6205  | 0.77 | -9.2 |
| IR6276  | 0.71 | -9.2 |
| IR6375  | 0.48 | -9.2 |
| IR6411  | 0.73 | -9.2 |
| IR6560  | 0.4  | -9.2 |
| IR6643  | 0.46 | -9.2 |
| IR6780  | 0.45 | -9.2 |
| IR6787  | 0.52 | -9.2 |
| IR6965  | 0.64 | -9.2 |
| IR7203  | 0.81 | -9.2 |
| IR7244  | 0.71 | -9.2 |
| IR7272  | 0.8  | -9.2 |
| IR7294  | 0.54 | -9.2 |
| IR7310  | 0.58 | -9.2 |
| IR7419  | 0.7  | -9.2 |
| IR7432  | 0.57 | -9.2 |
| IR7438  | 0.49 | -9.2 |
| IR7479  | 0.55 | -9.2 |
| IR7904  | 0.89 | -9.2 |
| IR8029  | 0.74 | -9.2 |
| IR8225  | 0.55 | -9.2 |
| IR8287  | 0.48 | -9.2 |
| IR8314  | 0.5  | -9.2 |
| IR8497  | 0.62 | -9.2 |
| IR8509  | 0.55 | -9.2 |
| IR8545  | 0.44 | -9.2 |
| IR8582  | 0.83 | -9.2 |
| IR8645  | 0.44 | -9.2 |
| IR8751  | 0.79 | -9.2 |
| IR8808  | 0.5  | -9.2 |
| IR8889  | 0.79 | -9.2 |
| IR9014  | 0.94 | -9.2 |
| IR9077  | 0.77 | -9.2 |
| IR9093  | 0.67 | -9.2 |
| IR9220  | 0.65 | -9.2 |
| IR9345  | 0.49 | -9.2 |
| IR9653  | 0.58 | -9.2 |
| IR9935  | 0.8  | -9.2 |
| IR9998  | 0.86 | -9.2 |
| IR10202 | 0.8  | -9.2 |
| IR10518 | 0.73 | -9.2 |
| IR10670 | 0.51 | -9.2 |
| IR10692 | 0.66 | -9.2 |
| IR10731 | 0.64 | -9.2 |
| IR11012 | 0.75 | -9.2 |

|         |      |      |
|---------|------|------|
| IR11127 | 0.69 | -9.2 |
| IR11367 | 0.64 | -9.2 |
| IR11409 | 0.41 | -9.2 |
| IR11835 | 0.55 | -9.2 |
| IR12058 | 0.58 | -9.2 |
| IR12179 | 0.64 | -9.2 |
| IR12211 | 0.68 | -9.2 |
| IR12215 | 0.76 | -9.2 |
| IR12314 | 0.68 | -9.2 |
| IR12407 | 0.52 | -9.2 |
| IR12411 | 0.59 | -9.2 |
| IR12549 | 0.61 | -9.2 |
| IR12631 | 0.59 | -9.2 |
| IR12682 | 0.5  | -9.2 |
| IR12709 | 0.72 | -9.2 |
| IR12815 | 0.8  | -9.2 |
| IR13003 | 0.67 | -9.2 |
| IR13109 | 0.77 | -9.2 |
| IR13201 | 0.47 | -9.2 |
| IR13475 | 0.82 | -9.2 |
| IR13687 | 0.8  | -9.2 |
| IR13720 | 0.65 | -9.2 |
| IR13758 | 0.58 | -9.2 |
| IR13765 | 0.67 | -9.2 |
| IR13820 | 0.64 | -9.2 |
| IR13917 | 0.65 | -9.2 |
| IR13949 | 0.59 | -9.2 |
| IR13971 | 0.43 | -9.2 |
| IR14131 | 0.61 | -9.2 |
| IR14180 | 0.8  | -9.2 |
| IR14184 | 0.85 | -9.2 |
| IR23    | 0.67 | -9.1 |
| IR69    | 0.48 | -9.1 |
| IR80    | 0.47 | -9.1 |
| IR177   | 0.55 | -9.1 |
| IR280   | 0.79 | -9.1 |
| IR393   | 0.83 | -9.1 |
| IR394   | 0.72 | -9.1 |
| IR613   | 0.82 | -9.1 |
| IR625   | 0.53 | -9.1 |
| IR644   | 0.47 | -9.1 |
| IR656   | 0.6  | -9.1 |
| IR799   | 0.8  | -9.1 |
| IR811   | 0.63 | -9.1 |
| IR927   | 0.61 | -9.1 |
| IR972   | 0.42 | -9.1 |

|        |      |      |
|--------|------|------|
| IR998  | 0.67 | -9.1 |
| IR1011 | 0.7  | -9.1 |
| IR1021 | 0.8  | -9.1 |
| IR1143 | 0.59 | -9.1 |
| IR1150 | 0.55 | -9.1 |
| IR1182 | 0.72 | -9.1 |
| IR1231 | 0.53 | -9.1 |
| IR1252 | 0.42 | -9.1 |
| IR1456 | 0.67 | -9.1 |
| IR1462 | 0.66 | -9.1 |
| IR1687 | 0.55 | -9.1 |
| IR1899 | 0.65 | -9.1 |
| IR2091 | 0.66 | -9.1 |
| IR2120 | 0.47 | -9.1 |
| IR2206 | 0.52 | -9.1 |
| IR2329 | 0.68 | -9.1 |
| IR2353 | 0.73 | -9.1 |
| IR2373 | 0.79 | -9.1 |
| IR2429 | 0.57 | -9.1 |
| IR2465 | 0.57 | -9.1 |
| IR2642 | 0.83 | -9.1 |
| IR2665 | 0.69 | -9.1 |
| IR2694 | 0.8  | -9.1 |
| IR2730 | 0.53 | -9.1 |
| IR3101 | 0.8  | -9.1 |
| IR3330 | 0.84 | -9.1 |
| IR3341 | 0.44 | -9.1 |
| IR3414 | 0.74 | -9.1 |
| IR3429 | 0.43 | -9.1 |
| IR3516 | 0.8  | -9.1 |
| IR3521 | 0.71 | -9.1 |
| IR3639 | 0.7  | -9.1 |
| IR3658 | 0.41 | -9.1 |
| IR3755 | 0.74 | -9.1 |
| IR3827 | 0.53 | -9.1 |
| IR4134 | 0.64 | -9.1 |
| IR4272 | 0.48 | -9.1 |
| IR4431 | 0.61 | -9.1 |
| IR4463 | 0.7  | -9.1 |
| IR4614 | 0.84 | -9.1 |
| IR4817 | 0.57 | -9.1 |
| IR4832 | 0.77 | -9.1 |
| IR4960 | 0.49 | -9.1 |
| IR4961 | 0.67 | -9.1 |
| IR5007 | 0.84 | -9.1 |
| IR5104 | 0.51 | -9.1 |

|        |      |      |
|--------|------|------|
| IR5235 | 0.71 | -9.1 |
| IR5455 | 0.58 | -9.1 |
| IR5612 | 0.49 | -9.1 |
| IR5663 | 0.47 | -9.1 |
| IR5667 | 0.67 | -9.1 |
| IR5761 | 0.4  | -9.1 |
| IR6024 | 0.57 | -9.1 |
| IR6061 | 0.51 | -9.1 |
| IR6110 | 0.42 | -9.1 |
| IR6160 | 0.46 | -9.1 |
| IR6381 | 0.75 | -9.1 |
| IR6400 | 0.79 | -9.1 |
| IR6472 | 0.53 | -9.1 |
| IR6573 | 0.63 | -9.1 |
| IR7038 | 0.42 | -9.1 |
| IR7074 | 0.49 | -9.1 |
| IR7181 | 0.59 | -9.1 |
| IR7201 | 0.68 | -9.1 |
| IR7336 | 0.49 | -9.1 |
| IR7369 | 0.54 | -9.1 |
| IR7390 | 0.64 | -9.1 |
| IR7401 | 0.78 | -9.1 |
| IR7535 | 0.76 | -9.1 |
| IR7550 | 0.58 | -9.1 |
| IR7627 | 0.71 | -9.1 |
| IR7671 | 0.44 | -9.1 |
| IR7721 | 0.8  | -9.1 |
| IR7829 | 0.5  | -9.1 |
| IR7852 | 0.74 | -9.1 |
| IR7929 | 0.77 | -9.1 |
| IR8097 | 0.85 | -9.1 |
| IR8142 | 0.53 | -9.1 |
| IR8247 | 0.61 | -9.1 |
| IR8336 | 0.45 | -9.1 |
| IR8358 | 0.73 | -9.1 |
| IR8370 | 0.52 | -9.1 |
| IR8373 | 0.57 | -9.1 |
| IR8438 | 0.53 | -9.1 |
| IR8844 | 0.84 | -9.1 |
| IR9001 | 0.6  | -9.1 |
| IR9180 | 0.46 | -9.1 |
| IR9249 | 0.59 | -9.1 |
| IR9409 | 0.53 | -9.1 |
| IR9547 | 0.5  | -9.1 |
| IR9615 | 0.77 | -9.1 |
| IR9871 | 0.68 | -9.1 |

|         |      |      |
|---------|------|------|
| IR9887  | 0.63 | -9.1 |
| IR10069 | 0.45 | -9.1 |
| IR10161 | 0.4  | -9.1 |
| IR10166 | 0.44 | -9.1 |
| IR10242 | 0.48 | -9.1 |
| IR10312 | 0.66 | -9.1 |
| IR10334 | 0.76 | -9.1 |
| IR10487 | 0.71 | -9.1 |
| IR10563 | 0.72 | -9.1 |
| IR10690 | 0.92 | -9.1 |
| IR10866 | 0.61 | -9.1 |
| IR11296 | 0.82 | -9.1 |
| IR11374 | 0.68 | -9.1 |
| IR11502 | 0.78 | -9.1 |
| IR11541 | 0.7  | -9.1 |
| IR11556 | 0.6  | -9.1 |
| IR11641 | 0.71 | -9.1 |
| IR11677 | 0.78 | -9.1 |
| IR11704 | 0.51 | -9.1 |
| IR11713 | 0.59 | -9.1 |
| IR11726 | 0.49 | -9.1 |
| IR11869 | 0.68 | -9.1 |
| IR11872 | 0.47 | -9.1 |
| IR11881 | 0.77 | -9.1 |
| IR12119 | 0.66 | -9.1 |
| IR12340 | 0.77 | -9.1 |
| IR12392 | 0.44 | -9.1 |
| IR12528 | 0.62 | -9.1 |
| IR12556 | 0.92 | -9.1 |
| IR12963 | 0.83 | -9.1 |
| IR13094 | 0.64 | -9.1 |
| IR13393 | 0.75 | -9.1 |
| IR13437 | 0.79 | -9.1 |
| IR13480 | 0.55 | -9.1 |
| IR13793 | 0.62 | -9.1 |
| IR13795 | 0.58 | -9.1 |
| IR14038 | 0.77 | -9.1 |
| IR14259 | 0.47 | -9.1 |
| IR190   | 0.67 | -9   |
| IR220   | 0.47 | -9   |
| IR290   | 0.52 | -9   |
| IR390   | 0.58 | -9   |
| IR438   | 0.56 | -9   |
| IR480   | 0.6  | -9   |
| IR566   | 0.4  | -9   |
| IR571   | 0.67 | -9   |

|        |      |    |
|--------|------|----|
| IR653  | 0.51 | -9 |
| IR765  | 0.59 | -9 |
| IR767  | 0.49 | -9 |
| IR778  | 0.67 | -9 |
| IR903  | 0.54 | -9 |
| IR965  | 0.65 | -9 |
| IR1019 | 0.85 | -9 |
| IR1035 | 0.7  | -9 |
| IR1101 | 0.7  | -9 |
| IR1180 | 0.6  | -9 |
| IR1255 | 0.43 | -9 |
| IR1325 | 0.58 | -9 |
| IR1395 | 0.92 | -9 |
| IR1518 | 0.43 | -9 |
| IR1582 | 0.5  | -9 |
| IR1846 | 0.71 | -9 |
| IR1860 | 0.79 | -9 |
| IR1939 | 0.58 | -9 |
| IR1952 | 0.63 | -9 |
| IR1964 | 0.84 | -9 |
| IR2062 | 0.74 | -9 |
| IR2095 | 0.63 | -9 |
| IR2163 | 0.79 | -9 |
| IR2164 | 0.66 | -9 |
| IR2246 | 0.68 | -9 |
| IR2263 | 0.75 | -9 |
| IR2374 | 0.7  | -9 |
| IR2467 | 0.75 | -9 |
| IR2652 | 0.68 | -9 |
| IR2706 | 0.79 | -9 |
| IR2879 | 0.86 | -9 |
| IR2977 | 0.79 | -9 |
| IR3172 | 0.56 | -9 |
| IR3389 | 0.49 | -9 |
| IR3507 | 0.51 | -9 |
| IR3697 | 0.76 | -9 |
| IR3809 | 0.7  | -9 |
| IR3881 | 0.55 | -9 |
| IR3893 | 0.47 | -9 |
| IR3963 | 0.48 | -9 |
| IR3992 | 0.86 | -9 |
| IR4047 | 0.9  | -9 |
| IR4169 | 0.49 | -9 |
| IR4204 | 0.63 | -9 |
| IR4215 | 0.73 | -9 |
| IR4239 | 0.73 | -9 |



|        |      |    |
|--------|------|----|
| IR4253 | 0.42 | -9 |
| IR4338 | 0.43 | -9 |
| IR4355 | 0.85 | -9 |
| IR4396 | 0.64 | -9 |
| IR4416 | 0.48 | -9 |
| IR4441 | 0.51 | -9 |
| IR4464 | 0.45 | -9 |
| IR4469 | 0.55 | -9 |
| IR4619 | 0.53 | -9 |
| IR4621 | 0.53 | -9 |
| IR4705 | 0.79 | -9 |
| IR4984 | 0.61 | -9 |
| IR5114 | 0.48 | -9 |
| IR5343 | 0.72 | -9 |
| IR5362 | 0.45 | -9 |
| IR5393 | 0.91 | -9 |
| IR5557 | 0.78 | -9 |
| IR5592 | 0.91 | -9 |
| IR5633 | 0.63 | -9 |
| IR5700 | 0.81 | -9 |
| IR5862 | 0.69 | -9 |
| IR6317 | 0.69 | -9 |
| IR6458 | 0.59 | -9 |
| IR6464 | 0.94 | -9 |
| IR6720 | 0.59 | -9 |
| IR7069 | 0.52 | -9 |
| IR7141 | 0.77 | -9 |
| IR7175 | 0.49 | -9 |
| IR7192 | 0.74 | -9 |
| IR7256 | 0.43 | -9 |
| IR7258 | 0.9  | -9 |
| IR7332 | 0.4  | -9 |
| IR7462 | 0.57 | -9 |
| IR7564 | 0.69 | -9 |
| IR7653 | 0.46 | -9 |
| IR7744 | 0.41 | -9 |
| IR7764 | 0.59 | -9 |
| IR7805 | 0.54 | -9 |
| IR7806 | 0.53 | -9 |
| IR8001 | 0.49 | -9 |
| IR8100 | 0.61 | -9 |
| IR8133 | 0.48 | -9 |
| IR8249 | 0.47 | -9 |
| IR8482 | 0.94 | -9 |
| IR8578 | 0.65 | -9 |
| IR8651 | 0.57 | -9 |

|         |      |    |
|---------|------|----|
| IR8722  | 0.72 | -9 |
| IR8781  | 0.44 | -9 |
| IR8950  | 0.66 | -9 |
| IR8965  | 0.59 | -9 |
| IR8971  | 0.49 | -9 |
| IR9163  | 0.91 | -9 |
| IR9186  | 0.41 | -9 |
| IR9357  | 0.66 | -9 |
| IR9490  | 0.64 | -9 |
| IR9507  | 0.56 | -9 |
| IR9516  | 0.52 | -9 |
| IR9552  | 0.44 | -9 |
| IR9573  | 0.88 | -9 |
| IR9649  | 0.6  | -9 |
| IR9965  | 0.49 | -9 |
| IR10219 | 0.77 | -9 |
| IR10430 | 0.61 | -9 |
| IR10551 | 0.76 | -9 |
| IR10591 | 0.65 | -9 |
| IR10764 | 0.69 | -9 |
| IR10975 | 0.47 | -9 |
| IR11109 | 0.51 | -9 |
| IR11126 | 0.73 | -9 |
| IR11166 | 0.45 | -9 |
| IR11199 | 0.72 | -9 |
| IR11208 | 0.68 | -9 |
| IR11451 | 0.94 | -9 |
| IR11503 | 0.72 | -9 |
| IR11523 | 0.74 | -9 |
| IR11656 | 0.7  | -9 |
| IR11659 | 0.83 | -9 |
| IR11678 | 0.58 | -9 |
| IR11791 | 0.46 | -9 |
| IR11950 | 0.51 | -9 |
| IR11992 | 0.94 | -9 |
| IR12004 | 0.83 | -9 |
| IR12030 | 0.76 | -9 |
| IR12093 | 0.71 | -9 |
| IR12144 | 0.46 | -9 |
| IR12268 | 0.8  | -9 |
| IR12352 | 0.64 | -9 |
| IR12408 | 0.48 | -9 |
| IR12512 | 0.55 | -9 |
| IR12550 | 0.41 | -9 |
| IR12559 | 0.46 | -9 |
| IR12564 | 0.41 | -9 |

|         |      |      |
|---------|------|------|
| IR12585 | 0.58 | -9   |
| IR12618 | 0.71 | -9   |
| IR12698 | 0.8  | -9   |
| IR12842 | 0.56 | -9   |
| IR12925 | 0.85 | -9   |
| IR13222 | 0.54 | -9   |
| IR13274 | 0.43 | -9   |
| IR13513 | 0.49 | -9   |
| IR13524 | 0.51 | -9   |
| IR13660 | 0.52 | -9   |
| IR13666 | 0.5  | -9   |
| IR13792 | 0.69 | -9   |
| IR13864 | 0.64 | -9   |
| IR13894 | 0.48 | -9   |
| IR13912 | 0.52 | -9   |
| IR14106 | 0.57 | -9   |
| IR14173 | 0.49 | -9   |
| IR14193 | 0.64 | -9   |
| IR14295 | 0.86 | -9   |
| IR96    | 0.73 | -8.9 |
| IR239   | 0.58 | -8.9 |
| IR316   | 0.45 | -8.9 |
| IR456   | 0.72 | -8.9 |
| IR495   | 0.55 | -8.9 |
| IR522   | 0.6  | -8.9 |
| IR704   | 0.64 | -8.9 |
| IR776   | 0.77 | -8.9 |
| IR786   | 0.62 | -8.9 |
| IR838   | 0.5  | -8.9 |
| IR852   | 0.47 | -8.9 |
| IR893   | 0.41 | -8.9 |
| IR909   | 0.54 | -8.9 |
| IR928   | 0.61 | -8.9 |
| IR1023  | 0.82 | -8.9 |
| IR1025  | 0.68 | -8.9 |
| IR1054  | 0.82 | -8.9 |
| IR1094  | 0.77 | -8.9 |
| IR1154  | 0.49 | -8.9 |
| IR1295  | 0.8  | -8.9 |
| IR1388  | 0.68 | -8.9 |
| IR1394  | 0.81 | -8.9 |
| IR1492  | 0.49 | -8.9 |
| IR1545  | 0.62 | -8.9 |
| IR1551  | 0.43 | -8.9 |
| IR1564  | 0.42 | -8.9 |
| IR1598  | 0.46 | -8.9 |

|        |      |      |
|--------|------|------|
| IR1658 | 0.64 | -8.9 |
| IR1669 | 0.72 | -8.9 |
| IR1754 | 0.84 | -8.9 |
| IR1784 | 0.57 | -8.9 |
| IR1799 | 0.57 | -8.9 |
| IR1818 | 0.85 | -8.9 |
| IR1857 | 0.49 | -8.9 |
| IR1903 | 0.85 | -8.9 |
| IR1961 | 0.42 | -8.9 |
| IR1969 | 0.67 | -8.9 |
| IR1995 | 0.67 | -8.9 |
| IR2033 | 0.43 | -8.9 |
| IR2078 | 0.65 | -8.9 |
| IR2086 | 0.49 | -8.9 |
| IR2150 | 0.69 | -8.9 |
| IR2184 | 0.65 | -8.9 |
| IR2188 | 0.51 | -8.9 |
| IR2277 | 0.77 | -8.9 |
| IR2284 | 0.42 | -8.9 |
| IR2386 | 0.46 | -8.9 |
| IR2416 | 0.53 | -8.9 |
| IR2558 | 0.67 | -8.9 |
| IR2700 | 0.71 | -8.9 |
| IR2796 | 0.48 | -8.9 |
| IR2812 | 0.69 | -8.9 |
| IR2956 | 0.77 | -8.9 |
| IR3007 | 0.52 | -8.9 |
| IR3079 | 0.59 | -8.9 |
| IR3110 | 0.57 | -8.9 |
| IR3224 | 0.7  | -8.9 |
| IR3267 | 0.92 | -8.9 |
| IR3356 | 0.67 | -8.9 |
| IR3668 | 0.68 | -8.9 |
| IR3721 | 0.49 | -8.9 |
| IR3763 | 0.41 | -8.9 |
| IR3771 | 0.68 | -8.9 |
| IR3819 | 0.45 | -8.9 |
| IR3843 | 0.66 | -8.9 |
| IR4100 | 0.67 | -8.9 |
| IR4112 | 0.49 | -8.9 |
| IR4120 | 0.44 | -8.9 |
| IR4487 | 0.6  | -8.9 |
| IR4685 | 0.69 | -8.9 |
| IR4690 | 0.54 | -8.9 |
| IR4813 | 0.6  | -8.9 |
| IR4851 | 0.42 | -8.9 |

|        |      |      |
|--------|------|------|
| IR4881 | 0.86 | -8.9 |
| IR4940 | 0.57 | -8.9 |
| IR4964 | 0.43 | -8.9 |
| IR5099 | 0.48 | -8.9 |
| IR5122 | 0.81 | -8.9 |
| IR5142 | 0.58 | -8.9 |
| IR5244 | 0.93 | -8.9 |
| IR5280 | 0.62 | -8.9 |
| IR5403 | 0.63 | -8.9 |
| IR5408 | 0.54 | -8.9 |
| IR5450 | 0.59 | -8.9 |
| IR5512 | 0.63 | -8.9 |
| IR5547 | 0.8  | -8.9 |
| IR5655 | 0.43 | -8.9 |
| IR5775 | 0.61 | -8.9 |
| IR5939 | 0.63 | -8.9 |
| IR5949 | 0.58 | -8.9 |
| IR6059 | 0.68 | -8.9 |
| IR6069 | 0.52 | -8.9 |
| IR6202 | 0.58 | -8.9 |
| IR6256 | 0.84 | -8.9 |
| IR6321 | 0.67 | -8.9 |
| IR6443 | 0.73 | -8.9 |
| IR6452 | 0.63 | -8.9 |
| IR6462 | 0.54 | -8.9 |
| IR6500 | 0.58 | -8.9 |
| IR6684 | 0.46 | -8.9 |
| IR6703 | 0.67 | -8.9 |
| IR6708 | 0.91 | -8.9 |
| IR6757 | 0.62 | -8.9 |
| IR6773 | 0.85 | -8.9 |
| IR6779 | 0.51 | -8.9 |
| IR6825 | 0.54 | -8.9 |
| IR6826 | 0.84 | -8.9 |
| IR6918 | 0.74 | -8.9 |
| IR6923 | 0.79 | -8.9 |
| IR6994 | 0.65 | -8.9 |
| IR7047 | 0.5  | -8.9 |
| IR7109 | 0.66 | -8.9 |
| IR7168 | 0.73 | -8.9 |
| IR7210 | 0.53 | -8.9 |
| IR7217 | 0.48 | -8.9 |
| IR7375 | 0.76 | -8.9 |
| IR7440 | 0.84 | -8.9 |
| IR7446 | 0.68 | -8.9 |
| IR7469 | 0.69 | -8.9 |

|         |      |      |
|---------|------|------|
| IR7496  | 0.87 | -8.9 |
| IR7538  | 0.71 | -8.9 |
| IR7696  | 0.51 | -8.9 |
| IR7902  | 0.5  | -8.9 |
| IR8000  | 0.5  | -8.9 |
| IR8048  | 0.77 | -8.9 |
| IR8078  | 0.54 | -8.9 |
| IR8115  | 0.69 | -8.9 |
| IR8136  | 0.5  | -8.9 |
| IR8138  | 0.58 | -8.9 |
| IR8203  | 0.63 | -8.9 |
| IR8229  | 0.77 | -8.9 |
| IR8251  | 0.52 | -8.9 |
| IR8346  | 0.45 | -8.9 |
| IR8387  | 0.71 | -8.9 |
| IR8574  | 0.65 | -8.9 |
| IR8577  | 0.54 | -8.9 |
| IR8598  | 0.89 | -8.9 |
| IR8774  | 0.79 | -8.9 |
| IR8820  | 0.71 | -8.9 |
| IR8914  | 0.45 | -8.9 |
| IR8992  | 0.62 | -8.9 |
| IR9144  | 0.84 | -8.9 |
| IR9251  | 0.72 | -8.9 |
| IR9464  | 0.74 | -8.9 |
| IR9499  | 0.51 | -8.9 |
| IR9599  | 0.74 | -8.9 |
| IR9617  | 0.72 | -8.9 |
| IR9659  | 0.92 | -8.9 |
| IR9757  | 0.86 | -8.9 |
| IR9781  | 0.58 | -8.9 |
| IR9928  | 0.5  | -8.9 |
| IR9951  | 0.89 | -8.9 |
| IR10043 | 0.4  | -8.9 |
| IR10048 | 0.77 | -8.9 |
| IR10070 | 0.65 | -8.9 |
| IR10079 | 0.42 | -8.9 |
| IR10113 | 0.48 | -8.9 |
| IR10148 | 0.59 | -8.9 |
| IR10205 | 0.42 | -8.9 |
| IR10244 | 0.55 | -8.9 |
| IR10277 | 0.86 | -8.9 |
| IR10330 | 0.49 | -8.9 |
| IR10335 | 0.79 | -8.9 |
| IR10403 | 0.48 | -8.9 |
| IR10418 | 0.46 | -8.9 |

|         |      |      |
|---------|------|------|
| IR10421 | 0.52 | -8.9 |
| IR10505 | 0.82 | -8.9 |
| IR10546 | 0.62 | -8.9 |
| IR10594 | 0.41 | -8.9 |
| IR10756 | 0.61 | -8.9 |
| IR10857 | 0.76 | -8.9 |
| IR10937 | 0.8  | -8.9 |
| IR11073 | 0.73 | -8.9 |
| IR11163 | 0.75 | -8.9 |
| IR11242 | 0.84 | -8.9 |
| IR11337 | 0.65 | -8.9 |
| IR11360 | 0.57 | -8.9 |
| IR11496 | 0.75 | -8.9 |
| IR11570 | 0.58 | -8.9 |
| IR11948 | 0.67 | -8.9 |
| IR12041 | 0.6  | -8.9 |
| IR12084 | 0.61 | -8.9 |
| IR12095 | 0.55 | -8.9 |
| IR12154 | 0.77 | -8.9 |
| IR12162 | 0.62 | -8.9 |
| IR12216 | 0.63 | -8.9 |
| IR12338 | 0.68 | -8.9 |
| IR12376 | 0.91 | -8.9 |
| IR12377 | 0.75 | -8.9 |
| IR12428 | 0.6  | -8.9 |
| IR12431 | 0.75 | -8.9 |
| IR12450 | 0.6  | -8.9 |
| IR12555 | 0.88 | -8.9 |
| IR12602 | 0.77 | -8.9 |
| IR12715 | 0.87 | -8.9 |
| IR12717 | 0.67 | -8.9 |
| IR12730 | 0.71 | -8.9 |
| IR12731 | 0.52 | -8.9 |
| IR12777 | 0.72 | -8.9 |
| IR12818 | 0.51 | -8.9 |
| IR12850 | 0.55 | -8.9 |
| IR12918 | 0.79 | -8.9 |
| IR13028 | 0.66 | -8.9 |
| IR13173 | 0.53 | -8.9 |
| IR13185 | 0.72 | -8.9 |
| IR13210 | 0.77 | -8.9 |
| IR13261 | 0.61 | -8.9 |
| IR13312 | 0.51 | -8.9 |
| IR13329 | 0.46 | -8.9 |
| IR13372 | 0.57 | -8.9 |
| IR13457 | 0.59 | -8.9 |

|         |      |      |
|---------|------|------|
| IR13506 | 0.58 | -8.9 |
| IR13593 | 0.51 | -8.9 |
| IR13630 | 0.6  | -8.9 |
| IR13649 | 0.78 | -8.9 |
| IR13756 | 0.71 | -8.9 |
| IR13773 | 0.55 | -8.9 |
| IR13778 | 0.43 | -8.9 |
| IR13817 | 0.75 | -8.9 |
| IR13916 | 0.69 | -8.9 |
| IR13947 | 0.58 | -8.9 |
| IR13984 | 0.88 | -8.9 |
| IR14073 | 0.47 | -8.9 |
| IR14188 | 0.52 | -8.9 |
