# Supplementary material
Source: PubMed Central journal article supplement (PMC5535032)

## Identification of small molecule inhibitor of HBV replication via HBX interaction

Subhanita Ghosh<sup>1, a</sup>, Abhinav Kaushik<sup>2</sup>, Sachin Khurana<sup>3</sup>, Aditi Varshney<sup>4</sup>, Avishek Kumar Singh<sup>4</sup>, Pradeep Dahiya<sup>5</sup>, Jitendra K. Thakur<sup>5</sup>, Shiv Kumar Sarin<sup>4</sup>, Dinesh Gupta<sup>2</sup>, Pawan Malhotra<sup>3, \*, §</sup>, Sunil K. Mukherjee<sup>6, \*, §</sup>, Raj K. Bhatnagar<sup>1, \*, §</sup>

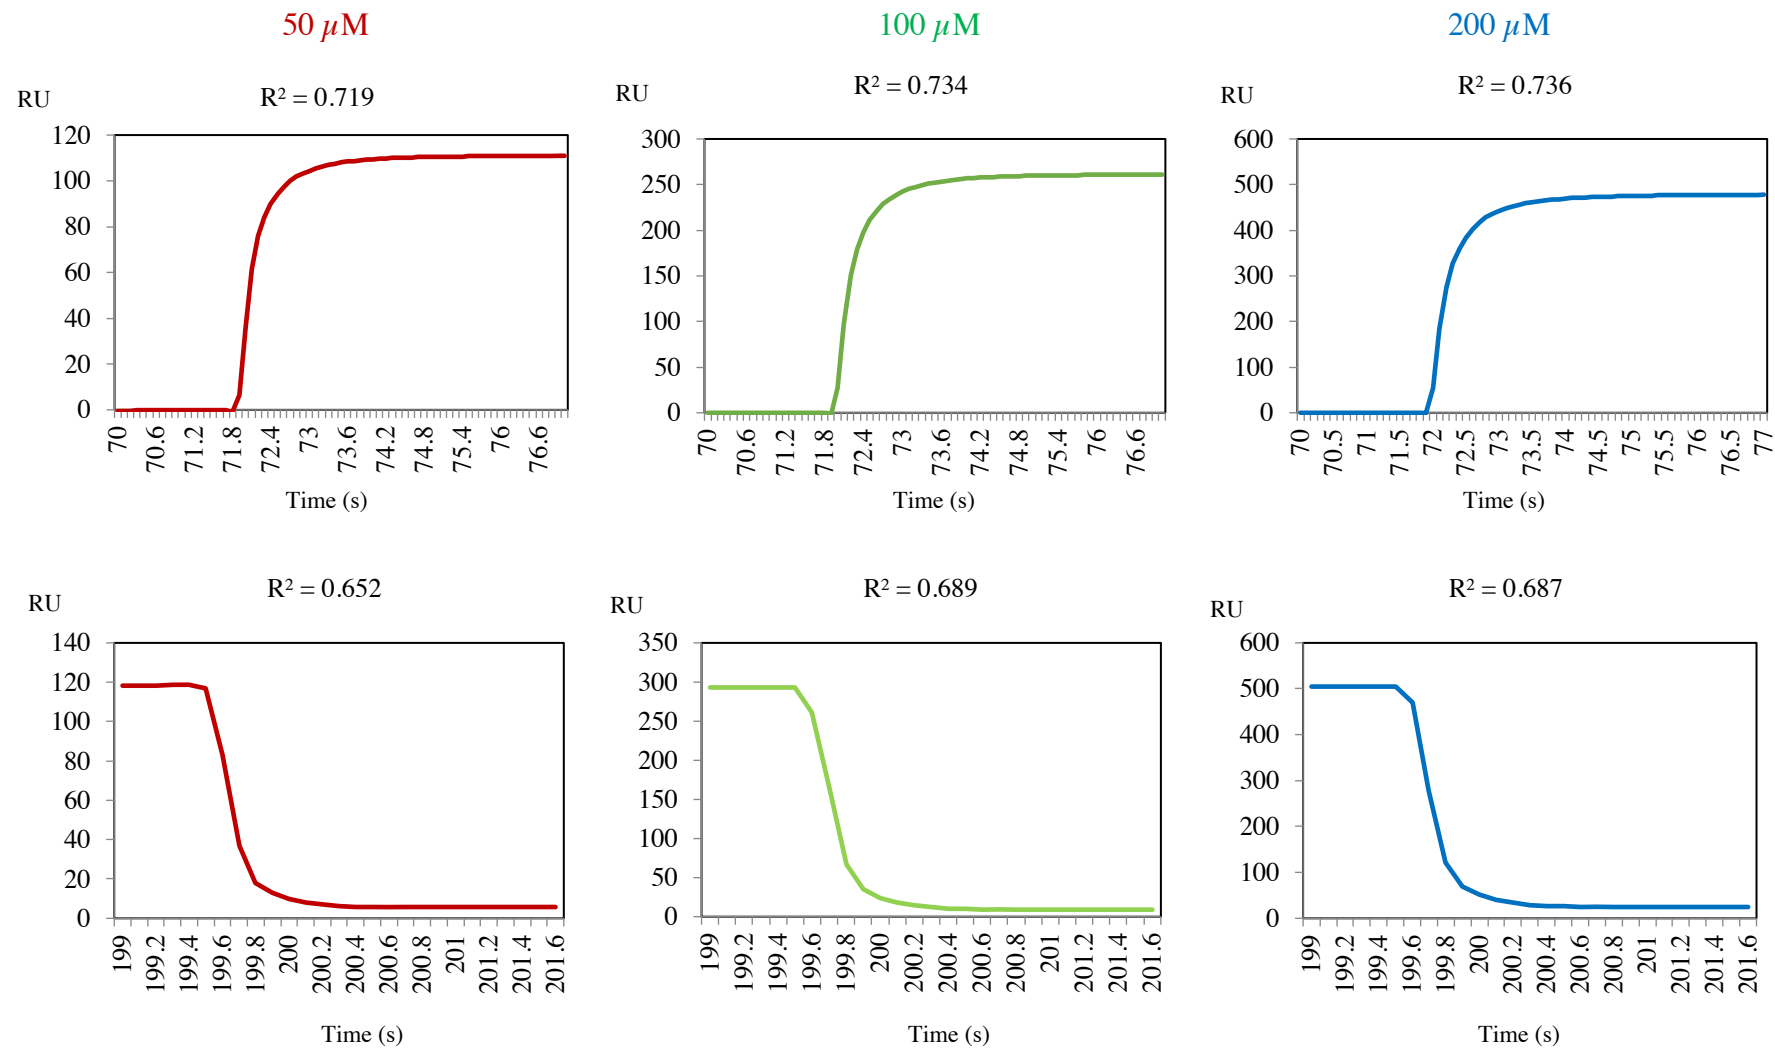

Supplement: 10.1074_M117.775155_jbc.M117.775155-3.pdf [file 10.1074_M117.775155_jbc.M117.775155-3.pdf]
