# Supplementary material
Source: PubMed Central journal article supplement (PMC5535032)
Supplement: 10.1074_M117.775155_jbc.M117.775155-4.pdf [file 10.1074_M117.775155_jbc.M117.775155-4.pdf]

### Identification of small molecule inhibitor of HBV replication via HBX interaction

Subhanita Ghosh<sup>1,a</sup>, Abhinav Kaushik<sup>2</sup>, Sachin Khurana<sup>3</sup>, Aditi Varshney<sup>4</sup>, Avishek Kumar Singh<sup>4</sup>, Pradeep Dahiya<sup>5</sup>, Jitendra K. Thakur<sup>5</sup>, Shiv Kumar Sarin<sup>4</sup>, Dinesh Gupta<sup>2</sup>, Pawan Malhotra<sup>3,\*</sup>, Sunil K. Mukherjee<sup>6,\*</sup>, Raj K. Bhatnagar<sup>1,\*</sup>

**Table S1: Molecular properties of compound IR415**

| Property Name                     | Property Value                             |
|-----------------------------------|--------------------------------------------|
| Molecular Weight                  | 296.34 g/mol                               |
| Density:                          | 1.3±0.1 g/cm <sup>3</sup>                  |
| Boiling Point:                    | 439.6±55.0 °C at 760 mmHg                  |
| Vapour Pressure:                  | 0.0±1.1 mmHg at 25°C                       |
| Enthalpy of Vaporization:         | 69.7±3.0 kJ/mol                            |
| Flash Point                       | 219.7±31.5 °C                              |
| Polarizability                    | 30.7±0.5 10 <sup>-24</sup> cm <sup>3</sup> |
| Surface Tension                   | 41.5±7.0 dyne/cm                           |
| Molar Volume                      | 224.3±7.0 cm <sup>3</sup>                  |
| Index of Refraction:              | 1.608                                      |
| Molar Refractivity:               | 77.5±0.5 cm <sup>3</sup>                   |
| Hydrogen Bond Donor Count         | 2                                          |
| Hydrogen Bond Acceptor Count      | 4                                          |
| Rotatable Bond Count              | 5                                          |
| Topological Polar Surface Area    | 74 Å <sup>2</sup>                          |
| Monoisotopic Mass                 | 296.091 g/mol                              |
| Exact Mass                        | 296.091 g/mol                              |
| XLogP3-AA                         | 1.8                                        |
| Compound Is Canonicalized         | true                                       |
| Formal Charge                     | 0                                          |
| Heavy Atom Count                  | 20                                         |
| Defined Atom Stereocenter Count   | 0                                          |
| Undefined Atom Stereocenter Count | 0                                          |
| Defined Bond Stereocenter Count   | 0                                          |
